# Supplementary material for: Single-cell profiling reveals a memory B cell-like subtype of follicular lymphoma with increased transformation risk
Source: PubMed Central journal article supplement (PMC9646774; doi:10.1038/s41467-022-34408-0), 2022-11-09
Supplement: 41467_2022_34408_MOESM3_ESM.pdf [file 41467_2022_34408_MOESM3_ESM.pdf]

## Description of Additional Supplementary Files

**Supplementary Data 1.** Biopsy site

**Supplementary Data 2.** FL sample composition by B-cell PG cluster (Raw cell numbers, % of malignant B-cells)

**Supplementary Data 3.** Intercluster Spearman distances (PG-to-PG level, MC-to-PG level, MC-to-MC level)

**Supplementary Data 4.** Marker contributions (MC-A vs. MC-B, MC-A vs. not MC-A, MC-B vs. not MC-B, MC-C vs. not MC-C, MC-D vs. not MC-D, MC-E vs. not MC-E, MC-F vs. not MC-F, MC-Mem vs. not MC-Mem, MC-Nav vs. not MC-Nav, MC-Others vs. not MC-Others)

**Supplementary Data 5.** FL samples (Composition by B-cell MC cluster, Dominant MC cluster)

**Supplementary Data 6.** Differential gene expression analysis (Gene list from scRNA-seq dataset, Reactome pathways using genes increased in type A from scRNA-seq dataset, Reactome pathways using genes increased in type B from scRNA-seq dataset, Gene list from bulk RNA-seq dataset, Reactome pathways using genes increased in type A from bulk RNA-seq dataset, Reactome pathways using genes increased in type B from bulk RNA-seq dataset)

**Supplementary Data 7.** Targeted sequencing (Panel composition, Mutation calls, DNA variants, Statistics)

**Supplementary Data 8.** IGHV somatic hypermutation

**Supplementary Data 9.** Antibody reagents (CyTOF, Full vs. reduced marker panels, Immunohistochemistry)

**Supplementary Data 10.** Full network image for Figure 5a.
