# Supplementary material for: Single-cell profiling reveals a memory B cell-like subtype of follicular lymphoma with increased transformation risk
Source: PubMed Central journal article supplement (PMC9646774; doi:10.1038/s41467-022-34408-0), 2022-11-09

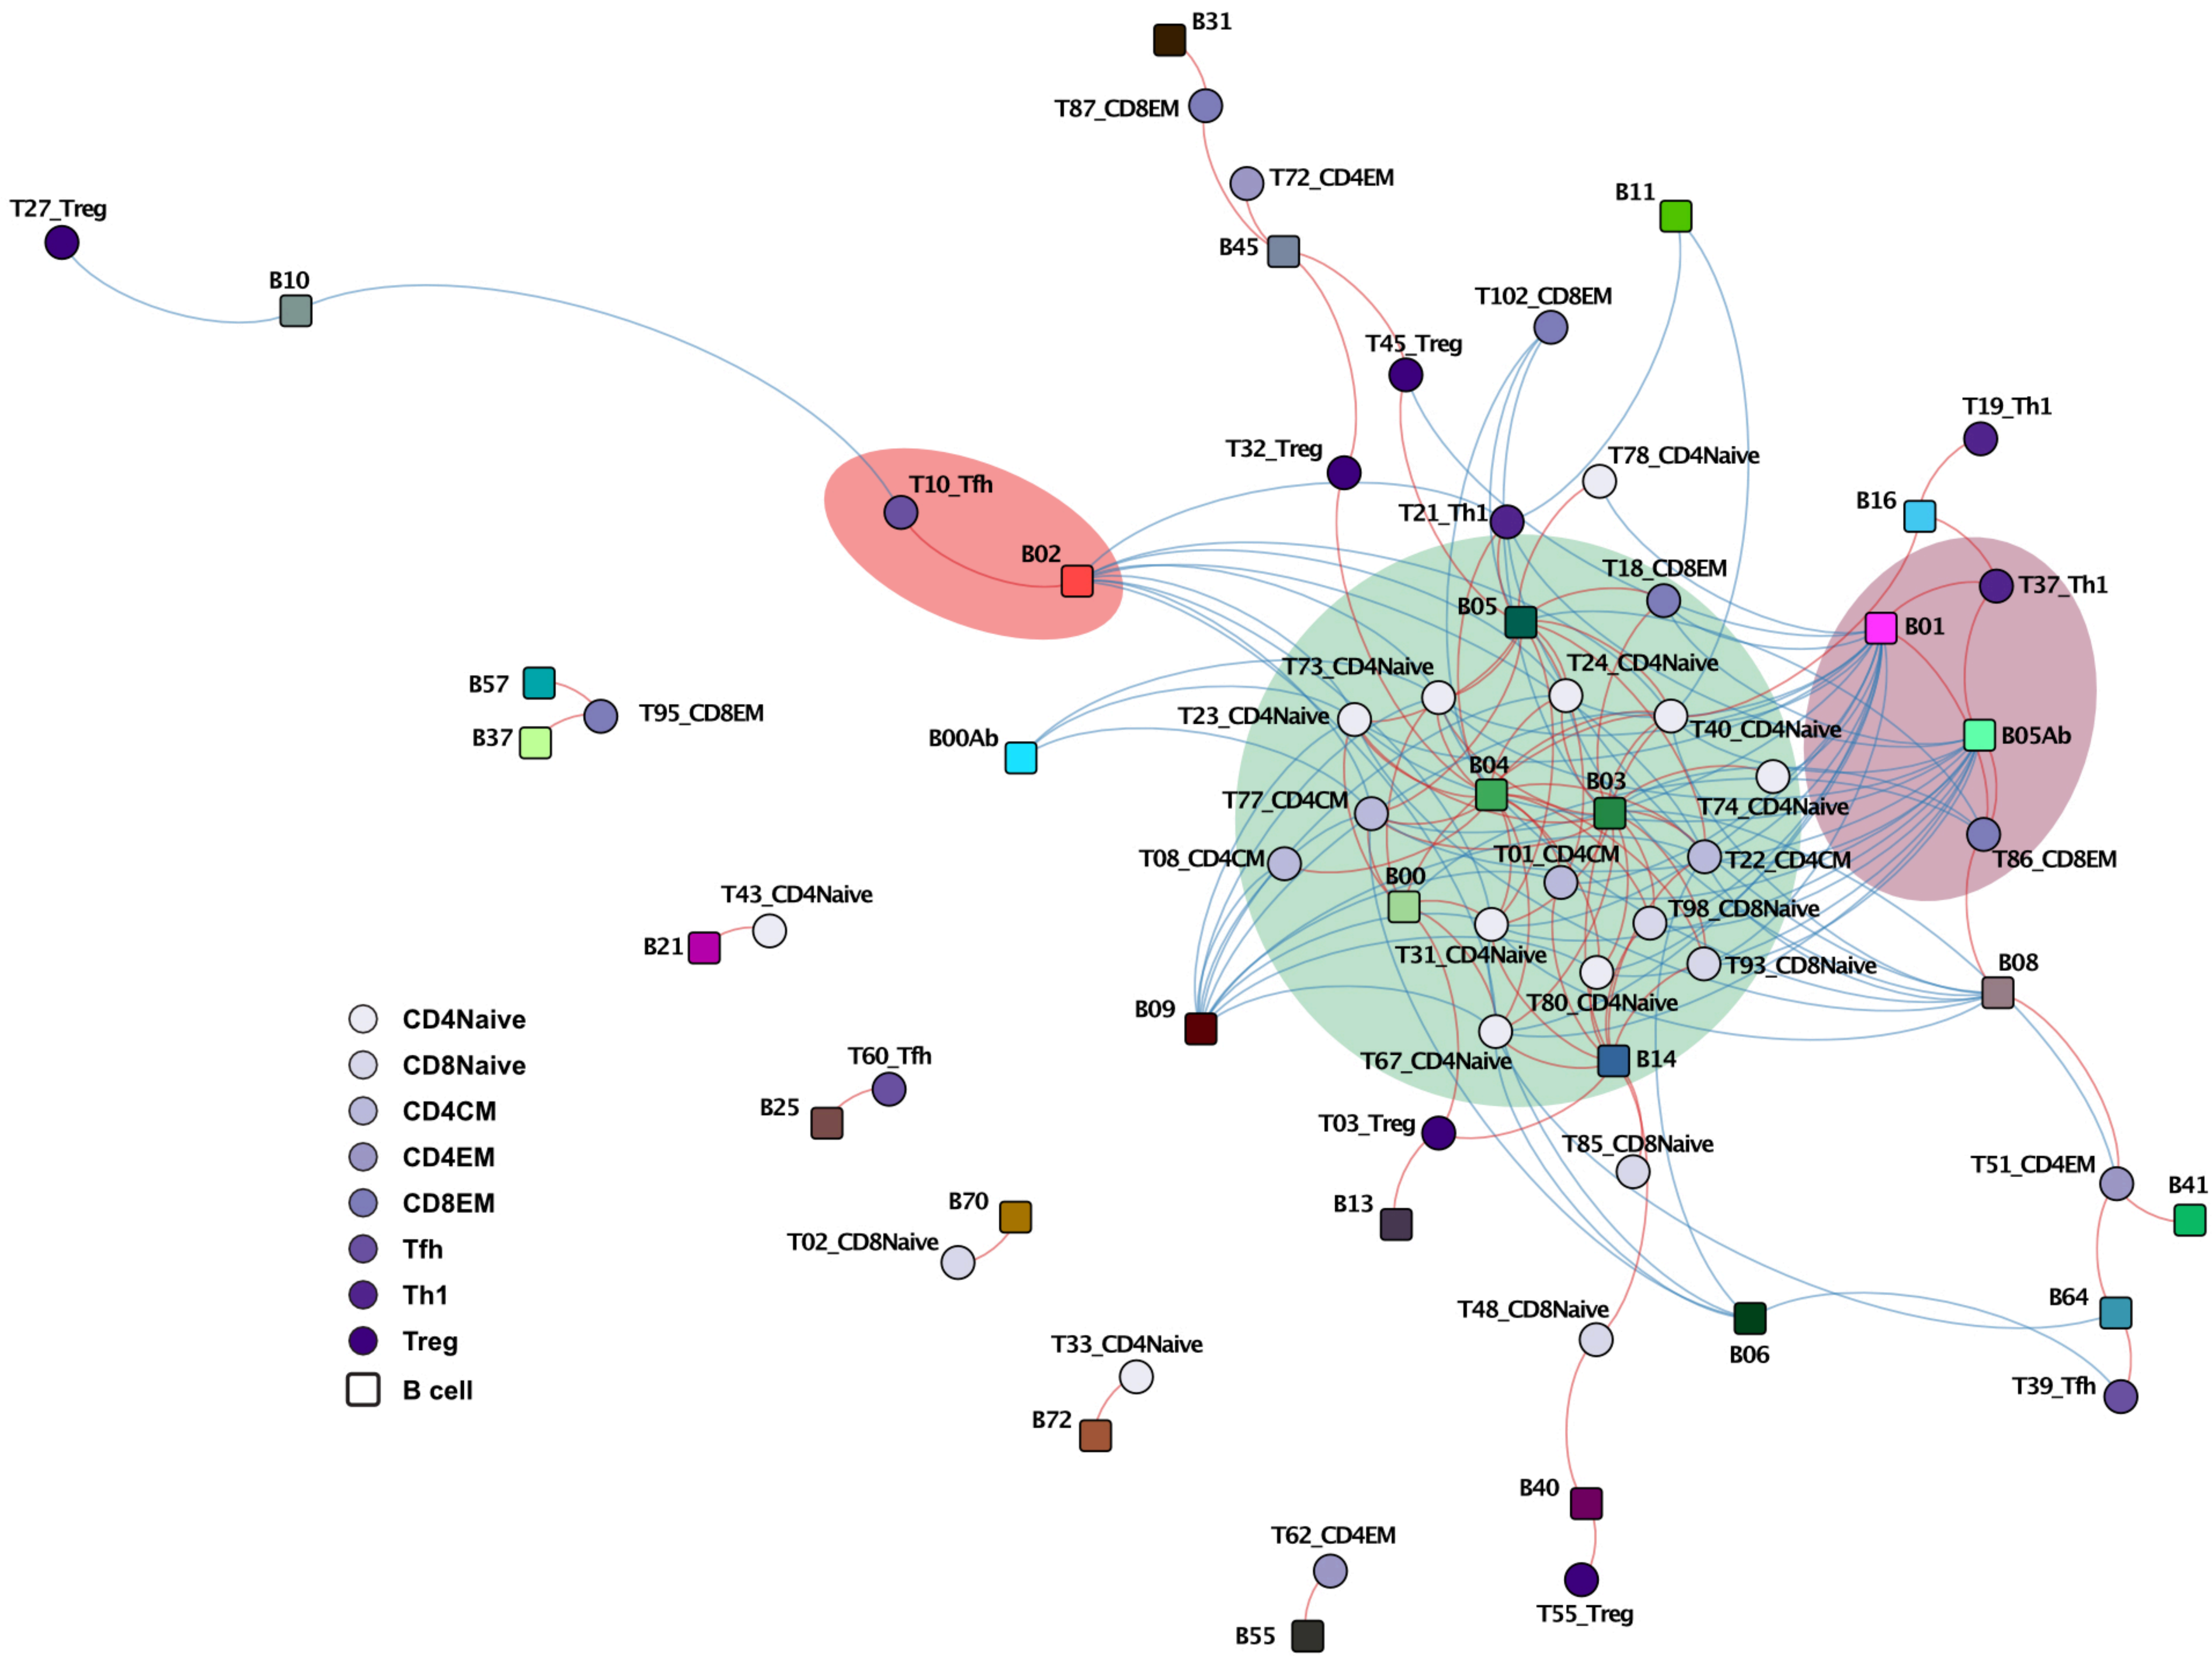

Supplement: 41467_2022_34408_MOESM13_ESM.pdf [file 41467_2022_34408_MOESM13_ESM.pdf]
